# Supplementary material for: Ligand-responsive upregulation of 3′ CITE-mediated translation in a wheat germ cell-free expression system
Source: Royal Society of Chemistry journal article supplement (doi:10.1039/c6mb00748a), 2016-12-07
Supplement: c6mb00748a1.pdf [file c6mb00748a1.pdf]

Electronic Supplementary Information

For

**Ligand-responsive upregulation of 3' CITE-mediated translation in a wheat germ cell-free expression system**

*Atsushi Ogawa,\* Yuta Murashige, Junichiro Tabuchi, and Taiki Omatsu*

*Proteo-Science Center, Ehime University, 3 Bunkyo-cho, Matsuyama, Ehime 790-8577, Japan*

**CONTENTS:**

**Preparation of DNA Templates. (p. S2)**

**Sequences of PCR Primers. (p. S2)**

**Preparation of mRNA Templates. (p. S8)**

**Translation of mRNA Templates in WGE. (p. S8)**

**YPet Assay. (p. S8)**

**Luciferase Assay. (p. S8)**

**Supplementary Figures. (p. S9)**

**References. (p. S13)**

**Preparation of DNA Templates.** DNA templates for *in vitro* transcription were prepared with sequential polymerase chain reactions (PCRs) by using PrimeSTAR Max DNA Polymerase, which has extremely high fidelity, from Takara Bio (Ohtsu, Japan). Most of the PCR primers were purchased from Thermo Fisher Scientific (Tokyo, Japan). PCR primers for the final PCR were synthesized and purified with an oligonucleotide purification cartridge by Eurofins Genomics (Tokyo, Japan). The primer sequences are described below. A plasmid encoding the Ypet gene (pHis-SRY-YPet)<sup>1</sup> or a plasmid encoding the NanoLuc (nLuc) gene (pEU-nLuc-Venus), the latter of which was kindly donated by Dr. Hiroyuki Takeda of Ehime University, was used as a PCR template in all 1<sup>st</sup> PCRs. All PCR products except those in the final PCR were agarose gel-purified and then used as a template in the next PCR.

### **Sequences of PCR Primers.**

(written from 5' (left) to 3' (right); shaded: non-original bases; red: bases for implanting aptamers; purple: bases for introducing mutations into aptamers).

Forward primer in the 1<sup>st</sup> PCR for **BY**, **5SL-BY**, **BYm** and **5SL-BYm**

CCCTTATTGCCTGACAAGCTAAGGGCCACCCTTCTTTCCCCACCGCCATCATGGCCCATCAC  
CATCACCATCAT

Forward primer in the 1<sup>st</sup> PCR for **BYm2**, **5SL-BYm2**, **5SL-BYm2-theo** and **5SL-BYm2-theo<sup>mut</sup>**

CCCTTATTGCCTGGCAAGCTAAGGGCCACCCTTCTTTCCCCACCGCCATCATGGCCCATCAC  
CATCACCATCAT

Reverse primer in the 1<sup>st</sup> PCR for **BY**, **5SL-BY**, **BYm**, **5SL-BYm**, **BYm2** and **5SL-BYm2**

GCCTGTTTCCCAGGATCCGATTTGTGCTAGTGGTGTGCTTTACTTGTACAGCTCGTTCAT  
GCCCTCA

Reverse primer in the 1<sup>st</sup> PCR for **5SL-BYm2-theo** and **5SL-BYm2-theo<sup>mut</sup>**

GCCTGTTTCCCAGGATCCGATTTGT**TGGTATCCCT**GTTGTCTTTACTTGTACAGCTCGTTCAT  
GCCCTCA

Forward primer in the 2<sup>nd</sup> PCR for **BY**, **5SL-BY**, **BYm** and **5SL-BYm**

GTGCTTGTAACACACTACGCGCCCGTTTTGTATTCGGGAAGTAGTTGCGAAAACGGTCCCC  
TTATTGCCTGACAAGCTA

Forward primer in the 2<sup>nd</sup> PCR for **BYm2**, **5SL-BYm2**, **5SL-BYm2-theo** and **5SL-BYm2-theo<sup>mut</sup>**

GTGCTTGTAACACACTACGCGCCCGTTTTGTATTCGGGAAGTAGTTGCGAAAACGGTCCCC  
TTATTGCCTGGCAAGCTA

Reverse primer in the 2<sup>nd</sup> PCR for **BY** and **5SL-BY**

TACGGCGGTAGGTTGACGGCCTACCCGAGCTTACGAACCGAAGTTCTGCCTGTTTCCCAGG  
ATCCGATTTG

Reverse primer in the 2<sup>nd</sup> PCR for **BYm** and **5SL-BYm**

TACGGCGGTAGGTTGACAGCCTACCCGAGCTTATGAACCGAAGTTCTGCCTGTTTCCCAGG  
ATCCGATTTG

Reverse primer in the 2<sup>nd</sup> PCR for **BYm2**, **5SL-BYm2**, **5SL-BYm2-theo** and **5SL-BYm2-theo<sup>mut</sup>**

TACGATACGGCGGTAGGTTGGCAGCCTACCCGAGCTTATGAACCGAAGTTCTGCCTGTTTC  
CCAGGATCCGATTTG

Forward primer in the 3<sup>rd</sup> (final for **BY**, **BYm** and **BYm2**) PCR for **BY**, **5SL-BY**, **BYm**, **5SL-BYm**,  
**BYm2**, **5SL-BYm2**, **5SL-BYm2-theo** and **5SL-BYm2-theo<sup>mut</sup>**

CATACGATTTAGGTGACACTATAGAAGTGAAGATTGACCATCTCACAAAAGCTGTTACGTG  
CTTGTAACACACTACG

Reverse primer in the 3<sup>rd</sup> (final for **BY** and **BYm**) PCR for **BY**, **5SL-BY**, **BYm**, **5SL-BYm**

GGCCAAACACAATACGATACGGCGGTAGGTTGAC

Reverse primer in the 3<sup>rd</sup> (final for **BYm2**) PCR for **BYm2** and **5SL-BYm2**

GGCCAAACACAATACGATACGGCGGTAGGTTG

Reverse primer in the 3<sup>rd</sup> PCR for **5SL-BYm2-theo**

GGGCTGCCAAGGACAATACGATACGGCGGTAGGTTG

Reverse primer in the 3<sup>rd</sup> PCR for **5SL-BYm2-theo<sup>mut</sup>**

GGGCTGCCTATGACAATACGATACGGCGGTAGGTTG

Forward primer in the 4<sup>th</sup> (final) PCR for **5SL-BY**, **5SL-BYm**, **5SL-BYm2**, **5SL-BYm2-theo** and **5SL-BYm2-theo<sup>mut</sup>**

GAAATTAATACGACTCACTATAGGGAGACCACAACGGTTTCCCGAAGTGAAGATTGACCAT  
CTCA

Reverse primer in the 4<sup>th</sup> (final) PCR for **5SL-BY** and **5SL-BYm**

GGCCAAACACAATACGATACGGCGGTAGGTTGAC

Reverse primer in the 4<sup>th</sup> (final) PCR for **5SL-BYm2**

GGCCAAACACAATACGATACGGCGGTAGGTTG

Reverse primer in the 4<sup>th</sup> (final) PCR for **5SL-BYm2-theo**

GGGCTGCCAAGGACAATACGATACGGCGGTAGGTTG

Reverse primer in the 4<sup>th</sup> (final) PCR for **5SL-BYm2-theo<sup>mut</sup>**

GGGCTGCCTATGACAATACGATACGGCGGTAGGTTG

Forward primer in the 1<sup>st</sup> (final) PCR for **pMK-106**

CATACGATTTAGGTGACACTATAG

Reverse primer in the 1<sup>st</sup> (final) PCR for **pMK-106**

ATACGCAAGGAAACAGCTATGAC

Forward primer in the 1<sup>st</sup> (final) PCR for **5SL-pMK-106**

GAAATTAATACGACTCACTATAGGGAGACCACAACGGTTTCCCGAACTCACCTATCTCCCC  
AACAC

Reverse primer in the 1<sup>st</sup> (final) PCR for **5SL-pMK-106**

ATACGCAAGGAAACAGCTATGAC

Forward primer in the 1<sup>st</sup> PCR for **5SL-pMK-106(nLuc)**

CATTCAATCACTCTTTCCACTAACCACCTATCTACATCACCAAGATATCACTAGTATGGTCT  
TCACACTCGAAGATTTTC

Reverse primer in the 1<sup>st</sup> PCR for **5SL-pMK-106(nLuc)**

TCCCGACTGGAAAGCGGGCAGTGAAAGGAAGGCCCATGAGGCCAGGAGCTCGAGTTACG  
CCAGAATGCGTTCGCACAG

Forward primer in the 2<sup>nd</sup> PCR for **5SL-pMK-106(nLuc)**

CATACGATTTAGGTGACTATAGAACTCACCTATCTCCCCAACACCTAATAACATTCAAT  
CACTCTTTCCACTAAC

Reverse primer in the 2<sup>nd</sup> PCR for **5SL-pMK-106(nLuc)**

ATACGCAAGGAAACAGCTATGACCATGTTAATGCAGCTGGCACGACAGGTTTCCCGACTGG  
AAAGCGGGCAGTGAA

Forward primer in the 3<sup>rd</sup> (final) PCR for **5SL-pMK-106(nLuc)**

GAAATTAATACGACTCACTATAGGGAGACCACAACGGTTTCCCGAACTCACCTATCTCCCC  
AACAC

Reverse primer in the 3<sup>rd</sup> (final) PCR for **5SL-pMK-106(nLuc)**

ATACGCAAGGAAACAGCTATGAC

Forward primer in the 1<sup>st</sup> PCR for **5SL-BYm2(nLuc)**, **5SL-BYm2-theo(nLuc)**, **5SL-BYm2-theo<sup>mut</sup>(nLuc)** and **5SL-BYm2-TMR(nLuc)**

CCCTTATTGCCTGGCAAGCTAAGGGCCACCCTTCTTTCCCCACCGCCATCATGGTCTTCACA  
CTCGAAGATTTC

Reverse primer in the 1<sup>st</sup> PCR for **5SL-BYm2(nLuc)**

GCCTGTTTCCCAGGATCCGATTTGTGCTAGTGGTGTGCTTTACGCCAGAATGCGTTCGCA  
CAG

Reverse primer in the 1<sup>st</sup> PCR for **5SL-BYm2-theo(nLuc)** and **5SL-BYm2-theo<sup>mut</sup>(nLuc)**

GCCTGTTTCCCAGGATCCGATTTGTGGTATCCCTGTTGTCTTTACGCCAGAATGCGTTCGC  
ACAG

Reverse primer in the 1<sup>st</sup> PCR for **5SL-BYm2-TMR(nLuc)**

GCCTGTTTCCCAGGATCCGATTTGTCACTCTTACCCTGTTGTCTTTACGCCAGAATGCGTTC  
GCACAG

Forward primer in the 2<sup>nd</sup> PCR for **5SL-BYm2(nLuc)**, **5SL-BYm2-theo(nLuc)**, **5SL-BYm2-theo<sup>mut</sup>(nLuc)** and **5SL-BYm2-TMR(nLuc)**

GTGCTTGTAACACACTACGCGCCCGTTTTGTATTCGGGAAGTAGTTGCCAAAACGGTCCCC  
TTATTGCCTGGCAAGCTA

Reverse primer in the 2<sup>nd</sup> PCR for **5SL-BYm2(nLuc)**, **5SL-BYm2-theo(nLuc)**, **5SL-BYm2-theo<sup>mut</sup>(nLuc)** and **5SL-BYm2-TMR(nLuc)**

TACGATACGGCGGTAGGTTGGCAGCCTACCCGAGCTTATGAACCGAAGTTCTGCCTGTTTC  
CCAGGATCCGATTTG

Forward primer in the 3<sup>rd</sup> PCR for **5SL-BYm2(nLuc)**, **5SL-BYm2-theo(nLuc)**, **5SL-BYm2-theo<sup>mut</sup>(nLuc)** and **5SL-BYm2-TMR(nLuc)**

CATACGATTTAGGTGACACTATAGAAGTGAAGATTGACCATCTCACAAAAGCTGTTACGTG  
CTTGTAACACACTACG

Reverse primer in the 3<sup>rd</sup> PCR for **5SL-BYm2(nLuc)**

GGCCAAACACAATACGATACGGCGGTAGGTT

Reverse primer in the 3<sup>rd</sup> PCR for **5SL-BYm2-theo(nLuc)**

GGGCTGCCAAGGACAATACGATACGGCGGTAGGTT

Reverse primer in the 3<sup>rd</sup> PCR for **5SL-BYm2-theo<sup>mut</sup>(nLuc)**

GGGCTGCCTATGACAATACGATACGGCGGTAGGTT

Reverse primer in the 3<sup>rd</sup> PCR for **5SL-BYm2-TMR (nLuc)**

GGGAAGACCTCTACAATACGATACGGCGGTAGGTT

Forward primer in the 4<sup>th</sup> (final) PCR for **5SL-BYm2(nLuc)**, **5SL-BYm2-theo(nLuc)**, **5SL-BYm2-theo<sup>mut</sup>(nLuc)** and **5SL-BYm2-TMR(nLuc)**

GAAATTAATACGACTCACTATAGGGAGACCACAACGGTTTCCCGAAGTGAAGATTGACCAT  
CTCA

Reverse primer in the 4<sup>th</sup> (final) PCR for **5SL-BYm2(nLuc)**

GGCCAAACACAATACGATACGGCGGTAGGTT

Reverse primer in the 4<sup>th</sup> (final) PCR for **5SL-BYm2-theo(nLuc)**

GGGCTGCCAAGGACAATACGATACGGCGGTAGGTT

Reverse primer in the 4<sup>th</sup> (final) PCR for **5SL-BYm2-theo<sup>mut</sup>(nLuc)**

GGGCTGCCTATGACAATACGATACGGCGGTAGGTT

Reverse primer in the 4<sup>th</sup> (final) PCR for **5SL-BYm2-TMR(nLuc)**

**GGGAAGACCTCT**ACAATACGATACGGCGGTAGGTT

**Preparation of mRNA Templates.** Run-off transcription of DNA templates was performed with an AmpliScribe SP6 High Yield Transcription Kit (CellScript, Madison, WI) or an AmpliScribe T7 High Yield Transcription Kit (CellScript) for 5'-SL-free mRNAs or 5'-SL-containing mRNAs, respectively, according to the manufacturer's protocol. The transcribed mRNA was purified with an RNeasy MinElute Cleanup Kit (QIAGEN, Tokyo, Japan) and quantified by the absorbance at 260 nm.

**Translation of mRNA Templates in WGE.** Cell-free translation of mRNA templates was carried out at 26°C for 1 h in batch mode (10 µL) with the WEPRO1240 Expression Kit (CellFree Sciences, Matsuyama, Japan) as previously described.<sup>1,2</sup>

**YPet Assay.** The fluorescence intensities of translated YPet were measured as previously described.<sup>1</sup>

**Luciferase Assay.** The translation solution was 1000-fold diluted in two steps with double-distilled water. An aliquot (45 µL) of the diluted solution was mixed with 8 µL of Nano-Glo Luciferase Assay Reagent containing furimazine (Promega, Tokyo, Japan) in a black 96-well plate.<sup>3</sup> The resulting chemiluminescence intensities were measured 3 min after the mixing with a Wallac ARVO MX (Perkin-Elmer, Yokohama, Japan). Chemiluminescence images were acquired using a Light-Capture imaging system (ATTO, Tokyo, Japan).



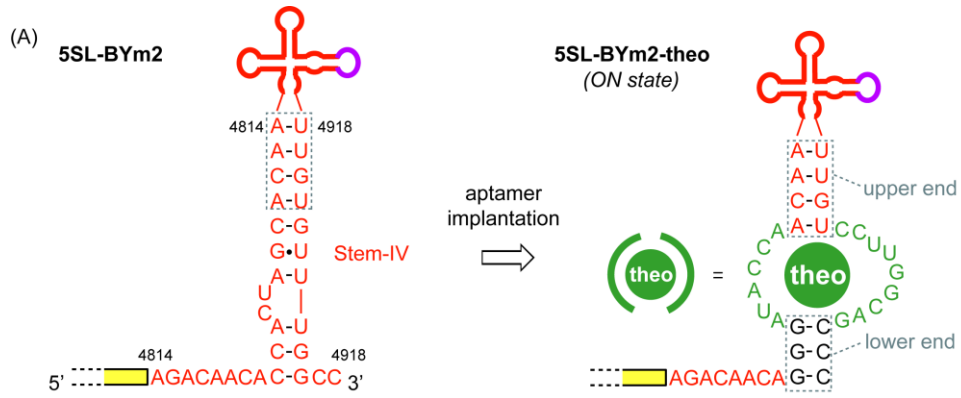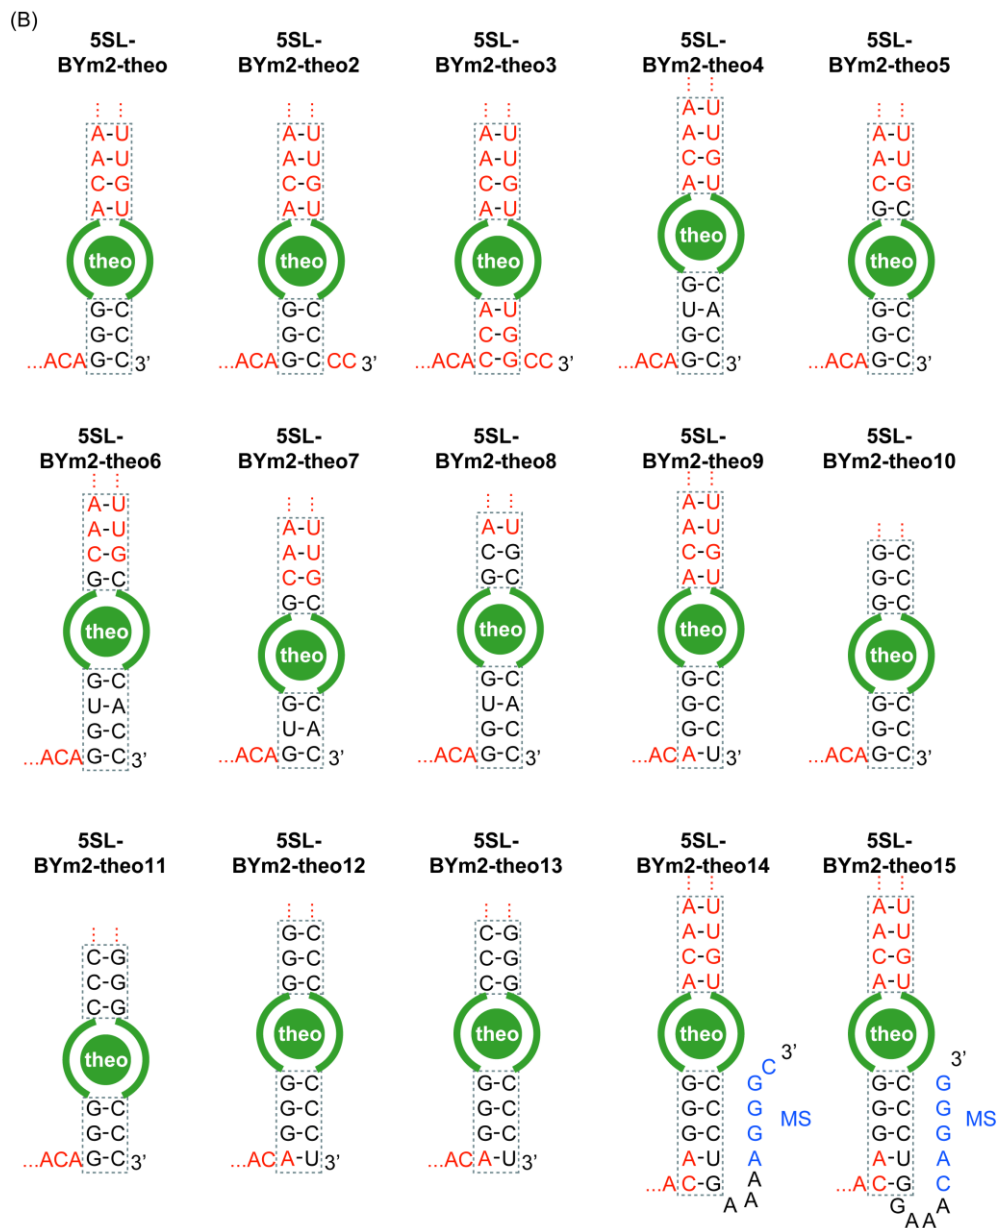

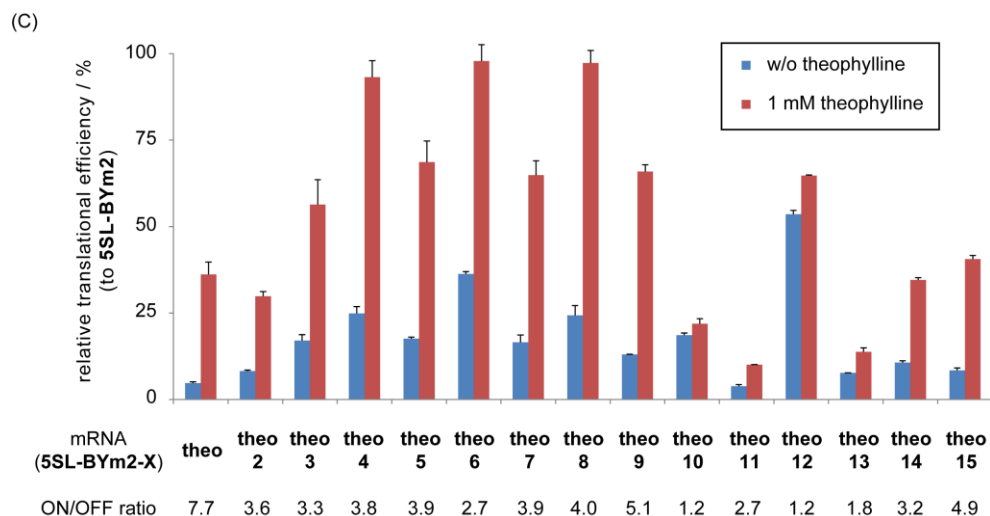

**Figure S1.** Validation of the design of **5SL-BYm2-theo**. (A) The design strategy for **5SL-BYm2-theo**: a split theophylline aptamer is implanted into Stem-IV of **5SL-BYm2**. Only the ON-state structure is shown for **5SL-BYm2-theo**. (B) Alteration of surrounding bases of the implanted theophylline aptamer in **5SL-BYm2-theo** for the preparation of other 14 riboswitch candidates (**5SL-BYm2-theo2~15**). **5SL-BYm2-theo14** and **5SL-BYm2-theo15** are hybridization switch-based riboswitches, which were constructed by adding a short modulator sequence (MS) to the 3' end by reference to our previous reports.<sup>2,4</sup> (C) The relative translation efficiencies of mRNAs in B in the absence or presence of 1 mM theophylline in WGE.

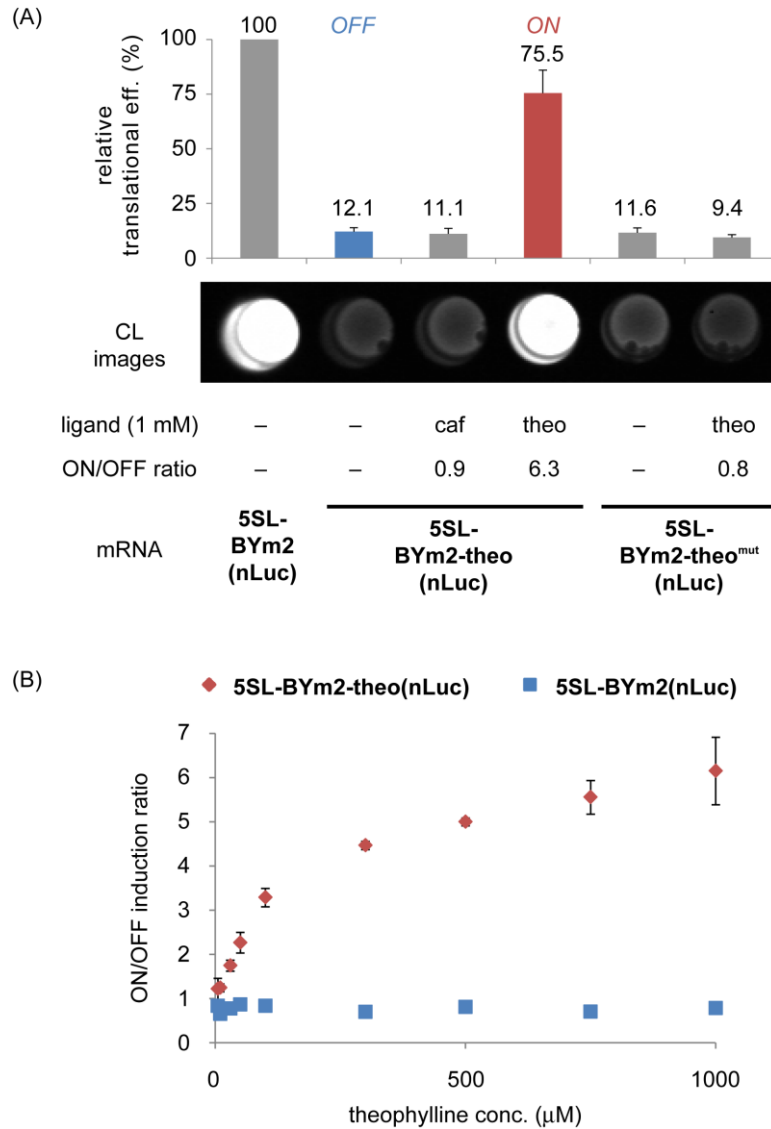

**Figure S2.** Characterization of **5SL-BYm2-theo(nLuc)**. (A) The relative activities (i.e., translation efficiencies, above) and chemiluminescence images (below) of nLuc translated from **5SL-BYm2-theo(nLuc)** and **5SL-BYm2-theo<sup>mut</sup>(nLuc)** in the absence or presence of 1 mM theophylline (theo) or caffeine (caf) in WGE. (B) The ON/OFF induction ratios of **5SL-BYm2-theo(nLuc)** and **5SL-BYm2(nLuc)** at various concentrations of theophylline.

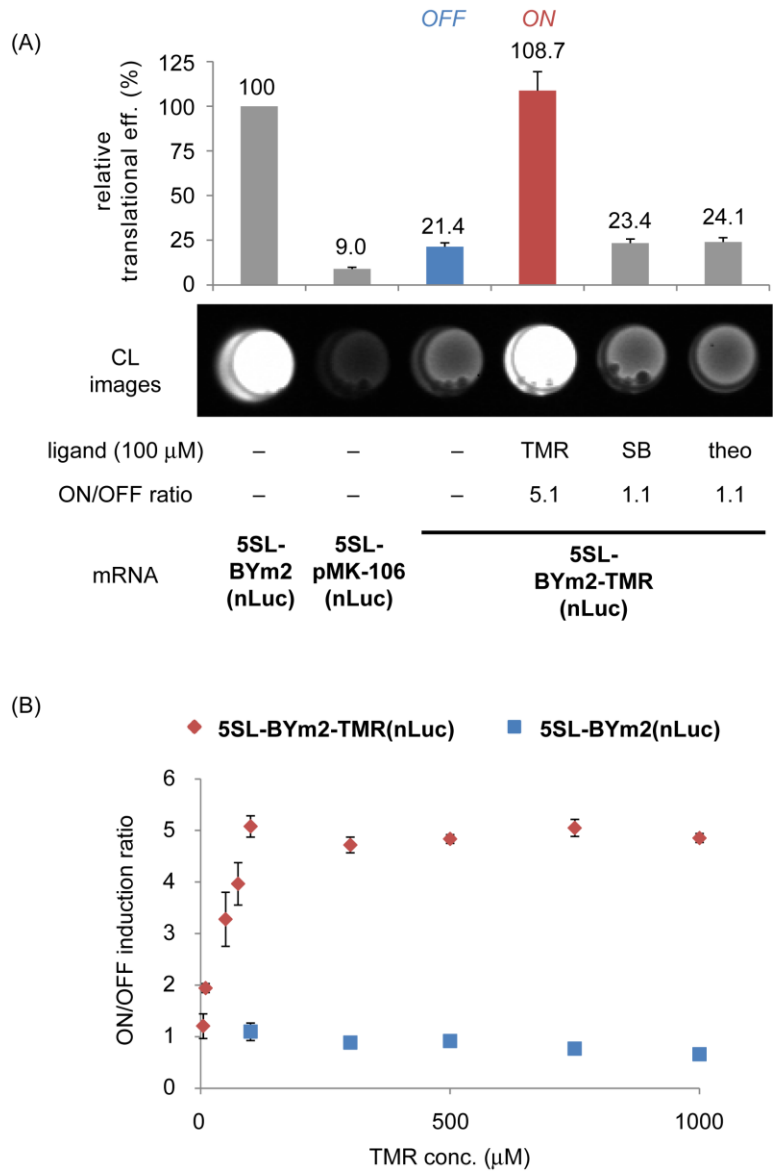

**Figure S3.** Characterization of **5SL-BYm2-TMR(nLuc)**. (A) The relative activities (i.e., translation efficiencies, above) and chemiluminescence images (below) of nLuc translated from **5SL-BYm2-TMR(nLuc)** in the absence or presence of 100  $\mu$ M 5-carboxytetramethylrhodamine (TMR), sulforhodamine B (SB) or theophylline (theo) in WGE. (B) The ON/OFF induction ratios of **5SL-BYm2-TMR(nLuc)** and **5SL-BYm2(nLuc)** at various concentrations of TMR.

## References.

- (1) A. Ogawa, J. Tabuchi and Y. Doi, *Bioorg. Med. Chem. Lett.*, 2014, **24**, 3724.
- (2) A. Ogawa, *RNA*, 2011, **17**, 478.
- (3) M. P. Hall *et al.*, *ACS Chem. Biol.*, 2012, **7**, 1848.
- (4) A. Ogawa and J. Tabuchi, *Org. Biomol. Chem.*, 2015, **13**, 6681.
